# Supplementary material
Source: PubMed Central journal article supplement (PMC6736713)
Supplement: NIHMS1536302-supplement-2.pdf [file NIHMS1536302-supplement-2.pdf]

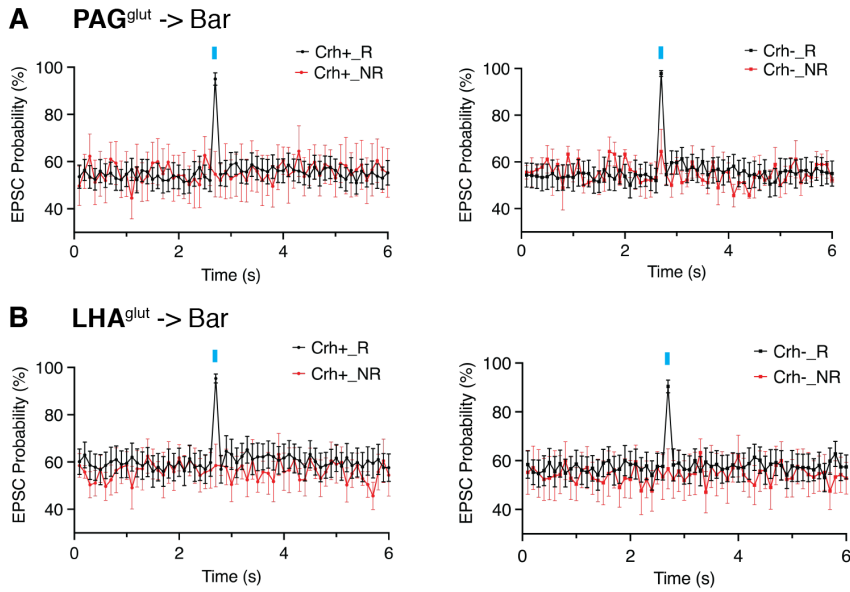

**Figure S1. Glutamatergic PAG and LHA neurons are functionally connected to Bar. Related to Figure 1.**

**A)** Average EPSC probability of Bar<sup>Crh/Vglut2</sup> (n = 28) or Bar<sup>Crh-negative</sup> (n = 20) neurons that responded and Bar<sup>Crh/Vglut2</sup> (n = 7) or Bar<sup>Crh-negative</sup> (n = 5) neurons that did not respond to photostimulation *in vitro*, of the vlPAG input.

**B)** Average EPSC probability of Bar<sup>Crh/Vglut2</sup> (left panel, n = 20) or Bar<sup>Crh-negative</sup> (right panel, n = 17) neurons that responded (R), and Bar<sup>Crh/Vglut2</sup> (n = 5) or Bar<sup>Crh-negative</sup> (n = 7) neurons that did not respond (NR) to photostimulation of the LHA input.

Blue bars at the top of the recording traces indicate 10 ms blue light pulse stimulation. Group data are presented as population mean  $\pm$  s.e.m. *Abbreviations: Bar, Barrington's Nucleus; LHA, lateral hypothalamic area; PAG, periaqueductal gray; vl, ventrolateral.*

**A** “Micturition Video Thermography (MVT)”

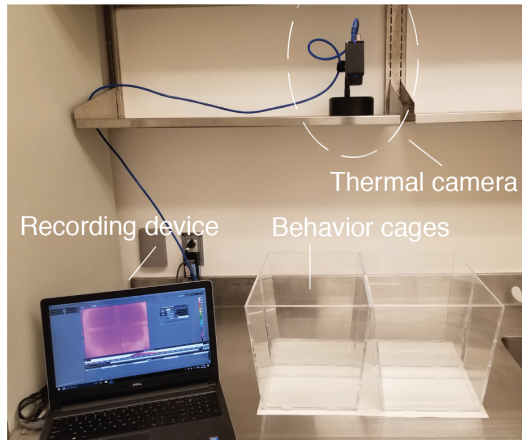

**B**

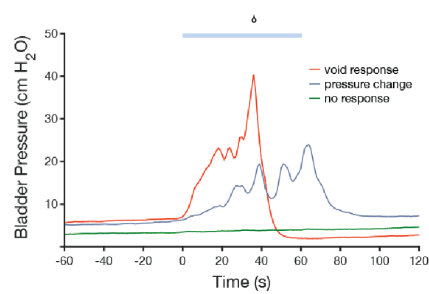

**C** **PAG**<sup>Vglut2 -> Bar</sup>

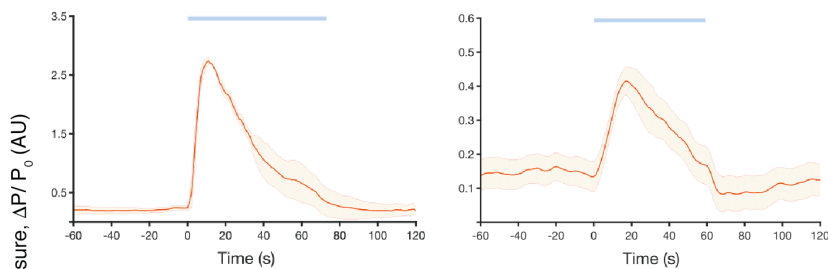

**D** **LHA**<sup>Vglut2 -> Bar</sup>

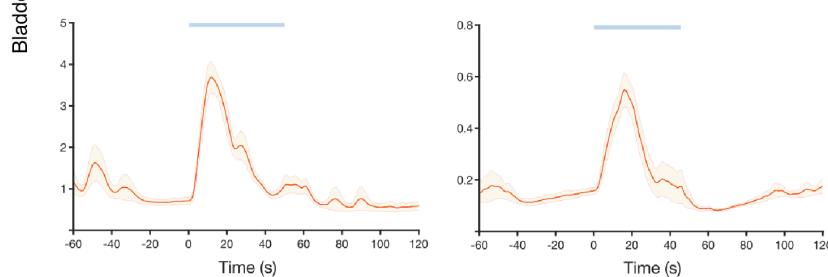

**Figure S2. Optogenetic activation of excitatory Bar afferents leads to void responses and increased bladder pressure. Related to STAR Methods.**

**A**) Micturition Video Thermography (MVT) setup for recording awake mice. The setup consists of a FLIR A65 thermal imaging temperature sensor positioned over the center of (up to) four plexiglass behavior boxes atop filter paper.

**B**) Example traces of bladder pressure on CMG, before and during and after optogenetic stimulations. Green line: contraction with void, red line: contraction with no void, blue line: no pressure change. Droplet icon indicates voiding contraction leading to a void.

**C**) Averaged CMG bladder pressure traces, before, during and after optogenetic stimulation (blue line; 10 Hz, 5 ms) that resulted in a pressure change with a void, from 2 different anesthetized *Vglut2-IRE5-Cre* mice with AAV.DIO.ChR2 injected in PAG. Left and right, the data is an average of 3 and 12 micturition events, respectively.

**D)** Averaged CMG bladder pressure traces, before, during and after optogenetic stimulation (blue line; 10 Hz, 5 ms) that resulted in a pressure change with a void, from 2 different anesthetized *Vglut2-IRES-Cre* mice with AAV.DIO.ChR2 injected in LHA. Left and right, the data is an average of 15 and 17 micturition events. The shade in the graph represents the standard error of the mean.

*Abbreviations: Bar, Barrington's Nucleus; ChR2, Channelrhodopsin2; CMG, cystometrogram; LHA, lateral hypothalamic area; MVT, Micturition Video Thermography 'awake void spot assay'; PAG, periaqueductal gray.*

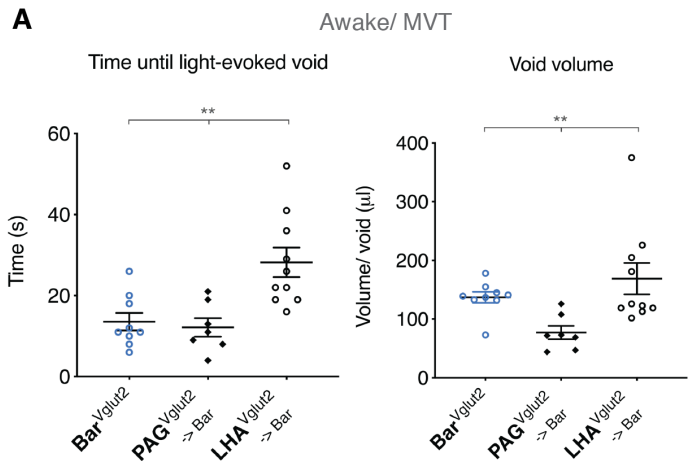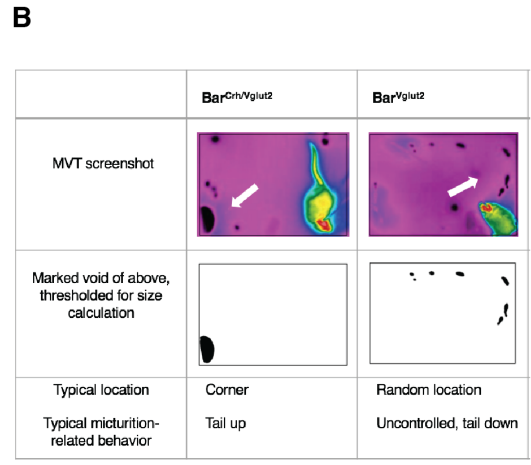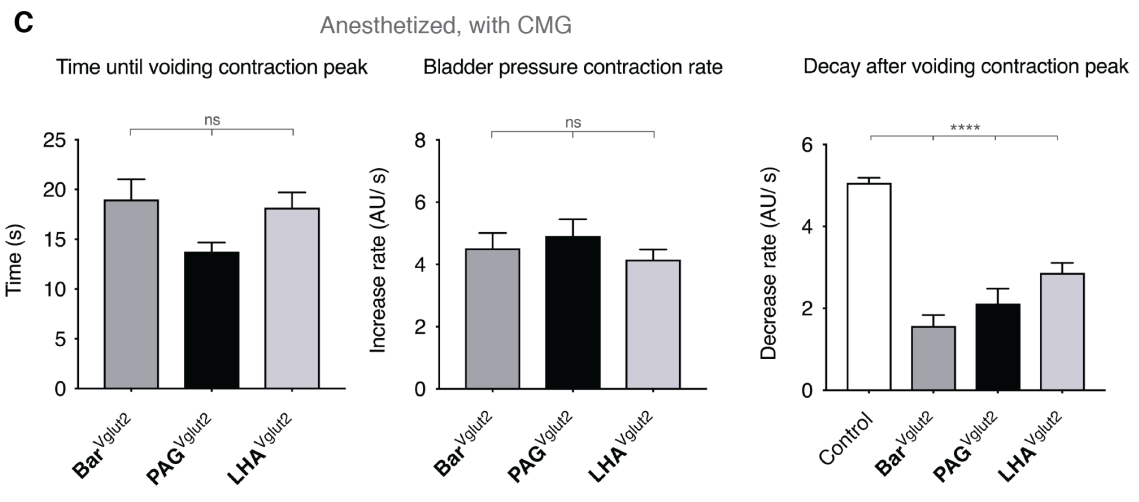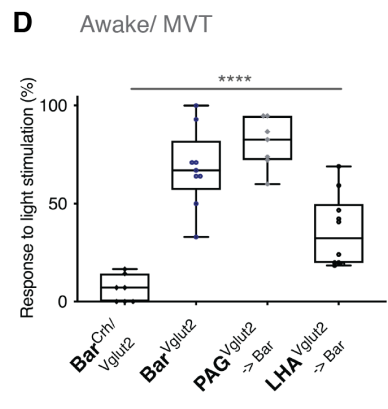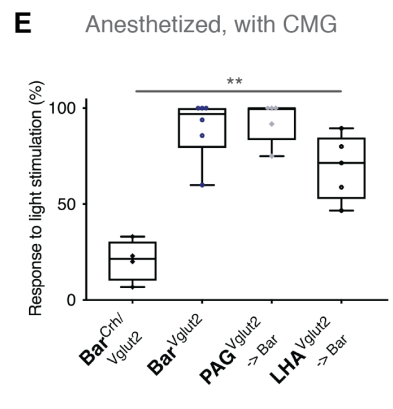

**Figure S3. Micturition-related behaviors and detrusor activity with optogenetic light stimulation of glutamatergic neurons or axon terminals. Related to Figure 3 and 4.**

**A)** Left graph: Averaged time until a light-evoked void from stimulation start, for Bar<sup>Vglut2</sup>, PAG<sup>Vglut2 -> Bar</sup> and LHA<sup>Vglut2 -> Bar</sup> in awake mice. Kruskal-Wallis test ANOVA; \*\* p = 0.0024, followed by Dunn's test for multiple comparisons; \*, p = 0.0113 and \*\*, p = 0.0083 for Bar<sup>Vglut2</sup> and PAG<sup>Vglut2 -> Bar</sup> respectively, vs. LHA<sup>Vglut2 -> Bar</sup>. Data are presented as mean ± s.e.m. in individual mice, Bar<sup>Vglut2</sup>, 85 events in 9 mice; PAG<sup>Vglut2</sup>, 120 events in 7 mice; LHA<sup>Vglut2</sup>, 101 events in 10 mice.

Right graph: Averaged volume per void of a light-evoked void, for Bar<sup>Vglut2</sup>, PAG<sup>Vglut2 -> Bar</sup> and LHA<sup>Vglut2 -> Bar</sup> in awake mice. Kruskal-Wallis test ANOVA; \*\* p = 0.0038, followed by Dunn's test for multiple comparisons; \*\*, p = 0.0067 and \*, p = 0.0128 for Bar<sup>Vglut2</sup> and LHA<sup>Vglut2 -> Bar</sup> respectively, vs. PAG<sup>Vglut2 -> Bar</sup>.

**B)** Screenshot images of a video thermography recording. Arrows point to a light-evoked void during a stimulation trial. Below the screenshot is the indicated void of above, thresholded for void volume calculation.

The lower row: typical location of a light-evoked void per condition, and typical behavior observed.

**C)** Time until voiding contraction peak with light-stimulation (left panel) and bladder pressure contraction rate from start of light stimulation until voiding contraction peak (middle). One-way ANOVA followed by Tukey's test for multiple comparisons; ns for both.

Right panel: pressure decrease in 15 seconds post light-evoked void contraction peak. One-way ANOVA; \*\*\*\*, p < 0.0001, followed by Dunnett's test for multiple comparisons; \*\*\*\*, p < 0.0001 for Bar<sup>Vglut2</sup>, PAG<sup>Vglut2 -> Bar</sup> and LHA<sup>Vglut2 -> Bar</sup>. Data are presented as sample mean ± s.e.m., n = Bar<sup>Control</sup>, 29 spontaneous void events without light stimulation in 3 mice; Bar<sup>Vglut2</sup>, 31 light-evoked void events in 6 mice; PAG<sup>Vglut2 -> Bar</sup>, 25 light-evoked void events in 4 mice; LHA<sup>Vglut2 -> Bar</sup>, 51 light-evoked void events in 5 mice.

**D)** Likelihood of a micturition event following optogenetic stimulation of Bar<sup>Crh/Vglut2</sup> neurons in awake mice ('Awake'; n = 7 mice, 82 stimulations, 17-23/ mouse), of Bar<sup>Vglut2</sup> neurons (n = 9 mice, 122 stimulations, 12-20/ mouse), of PAG<sup>Vglut2 -> Bar</sup> axon terminals in awake mice (n = 7 mice, 150 stimulations, 19-36/ mouse), of LHA<sup>Vglut2 -> Bar</sup> axon terminals in awake mice (n = 10 mice, 285 stimulations, 26-31/ mouse). Kruskal-Wallis test ANOVA; \*\*\*\*, p < 0.0001, followed by Dunn's test for multiple comparisons; \*\*\*, p = 0.0007 for Bar<sup>Crh/Vglut2</sup> vs. Bar<sup>Vglut2</sup>; \*\*\*\*, p < 0.0001 and \*, p = 0.0221 for Bar<sup>Crh/Vglut2</sup> and LHA<sup>Vglut2 -> Bar</sup> respectively, vs. PAG<sup>Vglut2 -> Bar</sup>.

**E)** Likelihood of a micturition event following optogenetic stimulation of Bar<sup>Crh/Vglut2</sup> neurons in anesthetized mice ('Anesthetized/ CMG'; n = 4 mice, 45 stimulations, 6-16/ mouse), of Bar<sup>Vglut2</sup> neurons (n = 6 mice, 43 stimulations, 5-10/ mouse), of PAG<sup>Vglut2 -> Bar</sup> axon terminals in anesthetized mice (n = 5 mice, 31 stimulations, 2-12/ mouse), of LHA<sup>Vglut2 -> Bar</sup> axon terminals in anesthetized mice (n = 5 mice, 87 stimulations, 15-21/ mouse). Data are represented as medians with min to max values. Kruskal-Wallis test ANOVA; \*\* p = 0.0039, followed by Dunn's test for multiple comparisons, \*, p = 0.0127 and \*\*, p = 0.0093 for Bar<sup>Crh/Vglut2</sup> vs. Bar<sup>Vglut2</sup> and PAG<sup>Vglut2 -> Bar</sup> respectively.

*Abbreviations: Bar, Barrington's Nucleus; CMG, cystometrogram; MVT, Micturition Video Thermography; LHA, lateral hypothalamic area; ns, not significant; PAG, periaqueductal gray.*

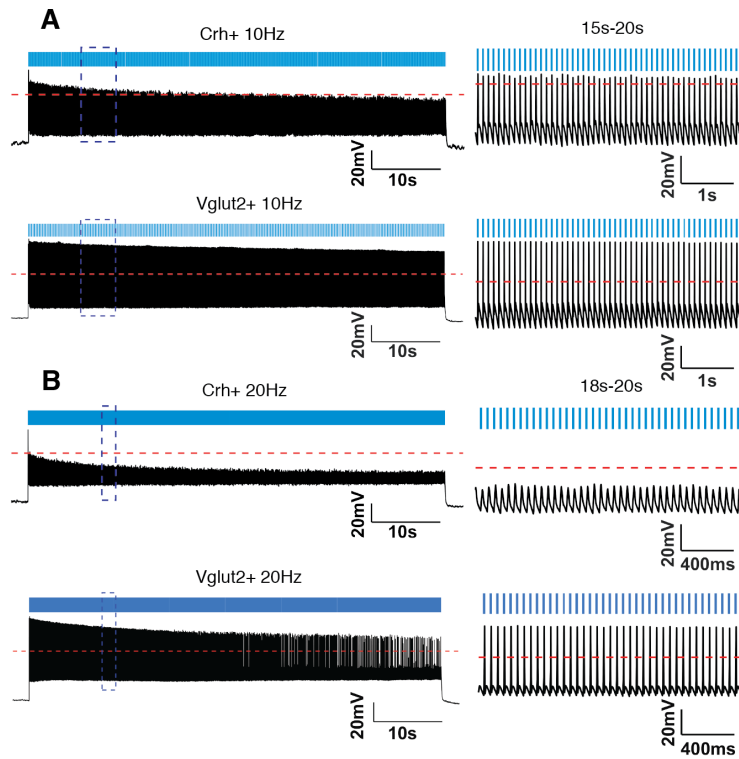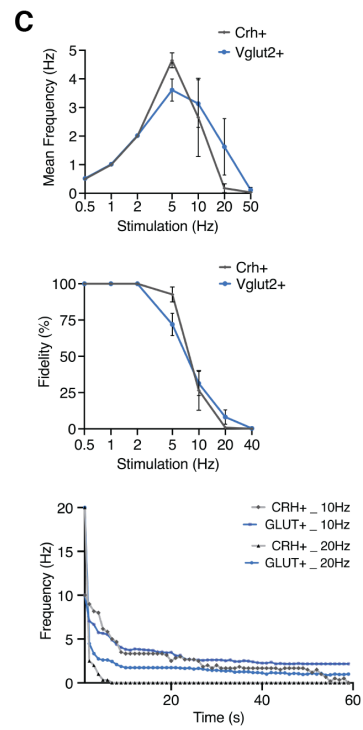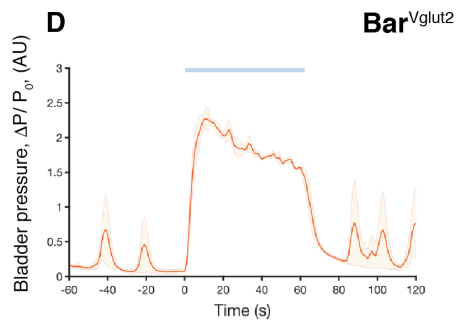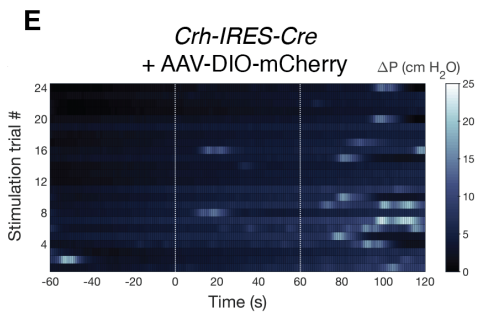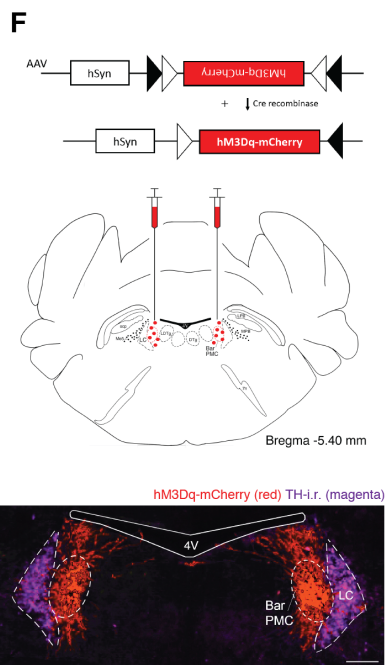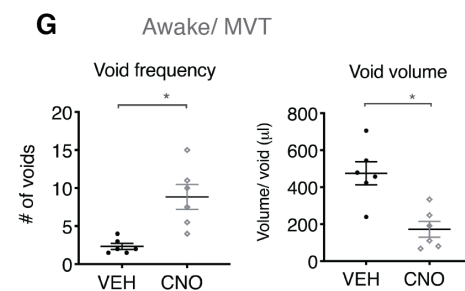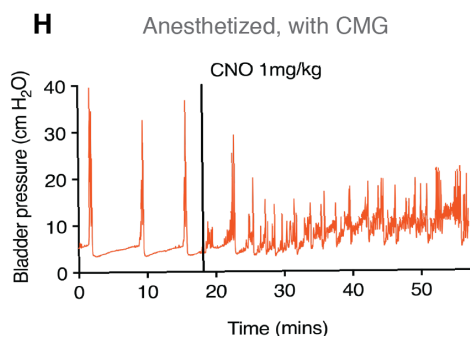

**Figure S4. Activation of neuron subpopulations in Bar triggers micturition behavior. Related to Figure 4.**

**A)** Left panels: sample traces of a  $\text{Bar}^{\text{Crh/Vglut2}}$  (upper left panel) and a  $\text{Bar}^{\text{Vglut2}}$  (lower left panel) neuron in response to 10 Hz of light stimulation *in vitro*. Right panels: magnification of the blue boxed portion (15s-20s).

**B)** Left panels: sample traces of a  $\text{Bar}^{\text{Crh/Vglut2}}$  (upper left panel) and a  $\text{Bar}^{\text{Vglut2}}$  (lower left panel) neuron in response to 20 Hz of light stimulation ( $n = 6$  cells for Crh,  $n = 23$  cells for Vglut2). Right panels, magnification of the blue boxed portion (18s-20s).

**C)** Upper panel: The mean frequency of action potential firing of  $\text{Bar}^{\text{Crh/Vglut2}}$  and  $\text{Bar}^{\text{Vglut2}}$  neurons in response to photostimulation. Middle: Spike fidelity in response to light pulse stimulation of  $\text{Bar}^{\text{Crh/Vglut2}}$  and  $\text{Bar}^{\text{Vglut2}}$  neurons. Lower: Changes in frequency of action potentials firing of  $\text{Bar}^{\text{Crh/Vglut2}}$  and  $\text{Bar}^{\text{Vglut2}}$  neurons during 1 min train of photostimulation at 10 Hz and 20 Hz.

**D)** Averaged CMG bladder pressure traces, before, during and after optogenetic stimulation (blue line; 10 Hz, 5 ms), from 2 different anesthetized *Vglut2-IRE5-Cre* mice with AAV.DIO.ChR2 injected in Bar. Left and right graphs include 3 and 8 micturition events during light stimulation. The shade in the graph represents the standard error of the mean.

**E)** Heatmap showing  $\Delta P$  before, during and after optogenetic stimulation (stimulus onset at time = 0s) from one control mouse. White dashed lines represent stimulus onset and offset.

**F)** Schematic of hM3Dq.mCherry construct targeted bilaterally to Bar in *Crh-IRE5-Cre* mice. Lower panel: hM3Dq.mCherry expressing  $\text{Bar}^{\text{Crh}}$  neurons (red), and TH-i.r. labeled neurons (magenta) at the level of Bar.

**G)** Frequency of voiding (left graph) and averaged volume per void (right), following hM3Dq activation with VEH or CNO administration (1 mg/ kg i.p.) of  $\text{Bar}^{\text{Crh/Vglut2}}$  neurons during 2-hour video thermography recordings. Wilcoxon matched-pairs signed rank test; \*,  $p = 0.0312$  (for frequency and for voided volume),  $n = 6$  mice. Data are presented as population mean  $\pm$  s.e.m.

**H)** A typical cystometrogram (CMG) bladder pressure trace, before and after CNO administration (1 mg/ kg i.p.), and activation of  $\text{Bar}^{\text{Crh}}$  neurons in an anesthetized *Crh-IRE5-Cre* mouse.

Scale bar is 200  $\mu\text{m}$ . Abbreviations: 4V, 4<sup>th</sup> ventricle; Bar, Barrington's Nucleus; ChR2, Channelrhodopsin2; CMG, cystometrogram; CNO, Clozapine-N-Oxide; i.r., immunoreactive; LC, locus coeruleus; MVT, Micturition Video Thermography; PMC, pontine micturition center; TH, tyrosine hydroxylase; VEH, vehicle.

### A *Crh-IRES-Cre + DIO-DTA*

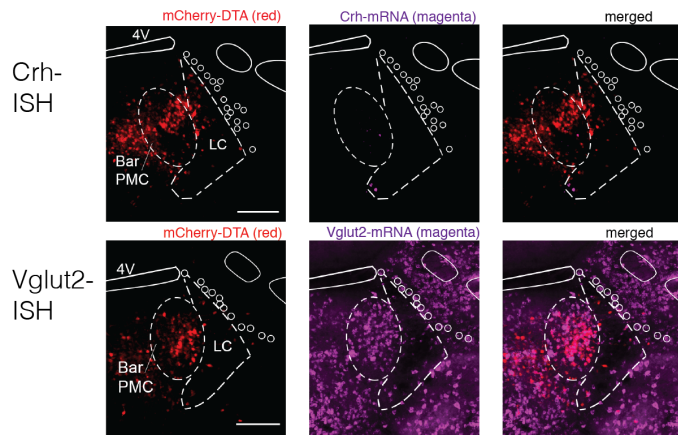

### B *Vglut2-IRES-Cre + DIO-DTA*

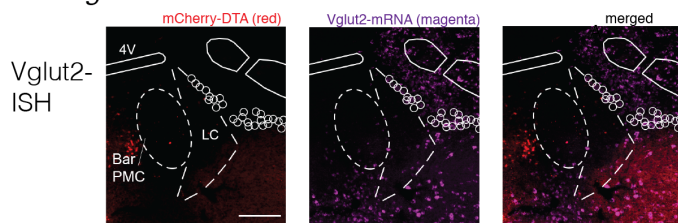

### C *C57Bl6/J + DIO-DTA*

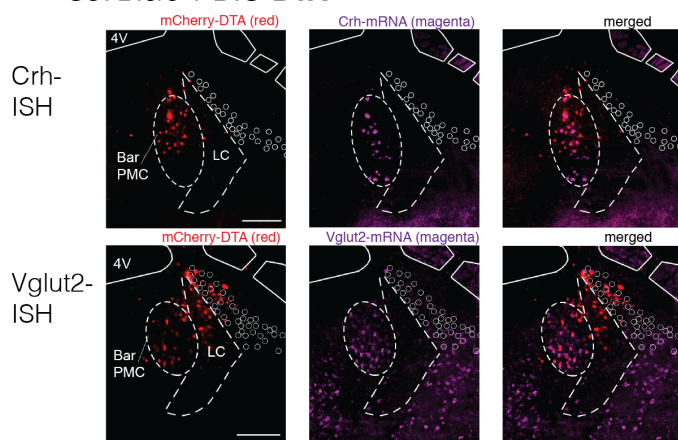

### D

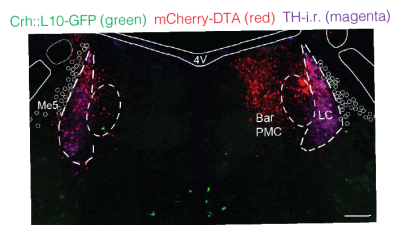

### E Void frequency (# of voids)

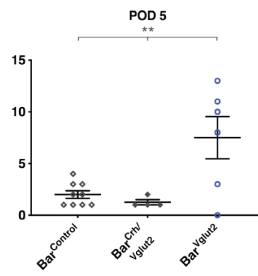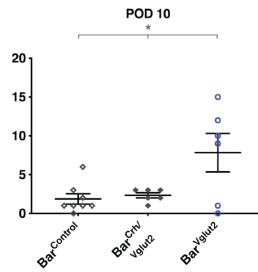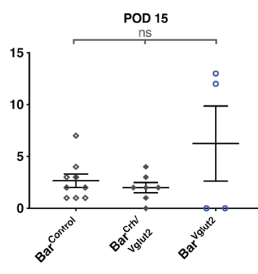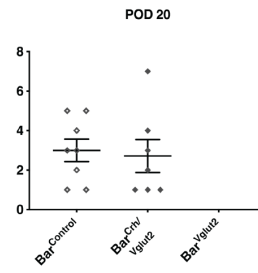

### F Volume/void (μl)

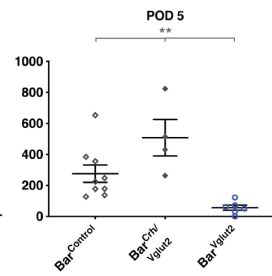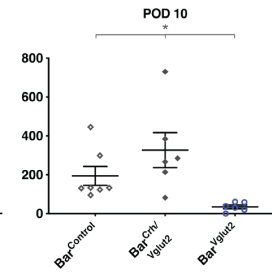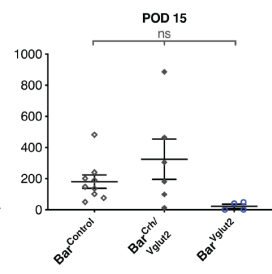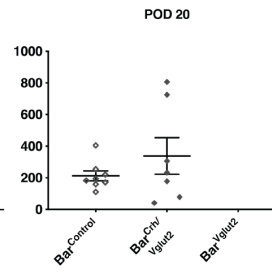

### G *C57Bl6/J + AAV-DIO-DTA*

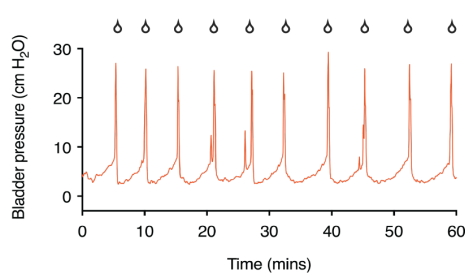



**Figure S5. Selective ablation of glutamatergic or glutamatergic-Crh+ Bar neurons causes retention or delays voiding contractions. Related to Figure 5.**

- A)** In a *Crh-IRES-Cre* mouse (left to right): mCherry.DTA (red) targeted to Bar<sup>Crh/Vglut2</sup> neurons, expression of mRNA for Crh (upper; magenta) or mRNA for Vglut2 (lower; magenta), and merged image.
- B)** In a *Vglut2-IRES-Cre* mouse (left to right): Bar neurons targeted with mCherry.DTA (red), Vglut2 mRNA expression (magenta), and merged image.
- C)** In a *C57Bl6* mouse (left to right): Bar neurons targeted with mCherry.DTA (red), mRNA for Crh (upper; magenta) or mRNA for Vglut2 expression (lower; magenta), and merged image.
- D)** DIO-DTA transduced neurons (red), remaining Crh-expressing neurons (green) ventral to the injection site, and TH-i.r. labeled neurons (magenta) at the level of the PMC.
- E)** Frequency of voiding during a 2-hour video thermography awake behavior recording on POD 5, 10, 15 or 20. Data is represented as population mean  $\pm$  s.e.m. for *C57Bl6/J* (Bar<sup>Control</sup>, n = 9 mice), *Crh-IRES-Cre* (Bar<sup>Crh/Vglut2</sup>, n = 7 mice) and *Vglut2-IRES-Cre* (Bar<sup>Vglut2</sup>, n = 4 mice) injected bilaterally with DIO-DTA. RM one-way ANOVA; POD 5; \*\*, p = 0.0039, with Dunnett's multiple comparisons test; \*\*, p = 0.0048 control vs. Bar<sup>Vglut2</sup>; POD 10; \*, p = 0.013; and with Dunnett's multiple comparisons test; \*, p = 0.011 control vs. Bar<sup>Vglut2</sup>; POD 15; ns.
- F)** Volume per void during a 2-hour video thermography awake behavior recording on POD 5, 10, 15 or 20. Data is represented as population mean  $\pm$  s.e.m. for *C57Bl6/J* (Bar<sup>Control</sup>, n = 9 mice), *Crh-IRES-Cre* (Bar<sup>Crh/Vglut2</sup>, n = 7 mice) and *Vglut2-IRES-Cre* (Bar<sup>Vglut2</sup>, n = 4 mice) injected bilaterally with DIO-DTA. RM one-way ANOVA; POD 5; \*\*, p = 0.0016, with Dunnett's multiple comparisons test; \*, p = 0.0482 and \*, p = 0.0326 for control vs. Bar<sup>Crh</sup> and Bar<sup>Vglut2</sup> respectively; POD 10; \*, p = 0.0118 and POD 15; ns.
- G)** A representative CMG bladder pressure trace recorded in an anesthetized *C57Bl6* control mouse with DIO-DTA virally targeted to Bar.

Scale bar is 200  $\mu$ m. Droplet icon indicates voiding contraction leading to a void. *Abbreviations:* 4V, 4<sup>th</sup> ventricle; Bar, Barrington's Nucleus; DTA, diphtheria toxin-subunit A; i.r., immunoreactive; ISH, In Situ Hybridization; LC, locus coeruleus; ns, not significant; PMC, pontine micturition center; POD, post-operative day; TH, tyrosine hydroxylase.

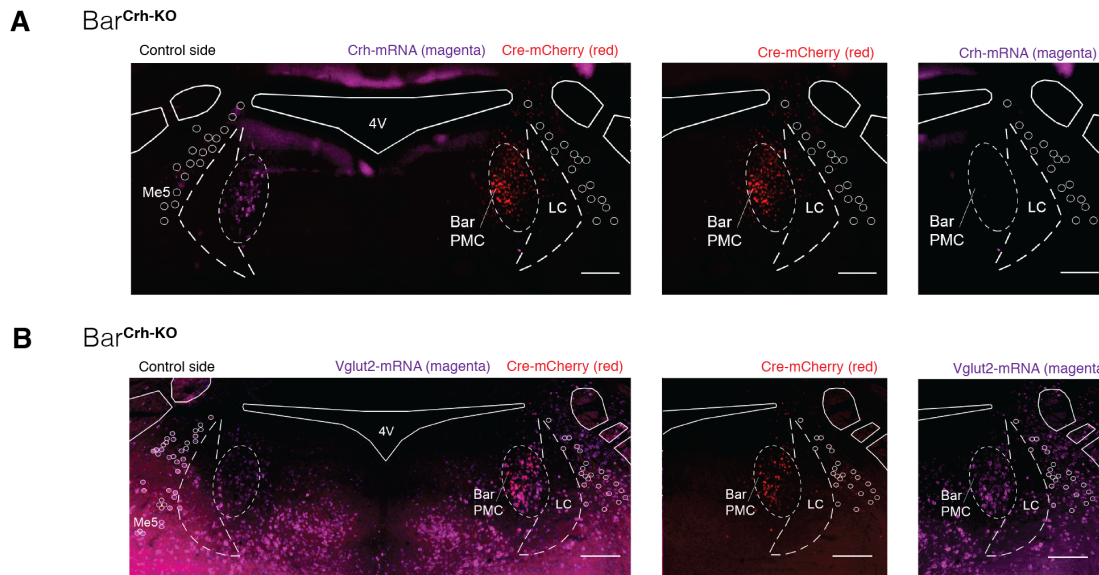

**Figure S6. Deleting Crh from Bar neurons does not affect voiding behavior significantly Related to Figure 6.**

**A)** AAV.Cre.mCherry injected unilaterally in Bar of Crh<sup>fl/fl</sup> mice. Left panel: merged image showing control and injected side (red), with Crh-mRNA in magenta. AAV.Cre.mCherry (red) targeted to Bar (middle), and Crh-mRNA (magenta; right).

**B)** AAV.Cre.mCherry injected unilaterally in Bar of Crh<sup>fl/fl</sup> mice. Left panel: merged image showing control and injected side (red), with Vglut2-mRNA in magenta. AAV.Cre.mCherry (red) targeted to Bar (middle), and Vglut2-mRNA (magenta; right).

Scale bar is 200  $\mu$ m. Abbreviations: 4V, 4<sup>th</sup> ventricle; Bar, Barrington's nucleus; KO, knockout; LC, locus coeruleus; PMC, pontine micturition center.
